1

2

## **Evaluation of mouse behavioral responses to nutritive versus nonnutritive sugar using a deep learning-based 3D real-time pose estimation system**

4

5

6

7 Jineun Kim<sup>1,2</sup>, Dae-gun Kim<sup>1,2</sup>, Wongyo Jung<sup>1,2</sup>, Greg S. B. Suh<sup>1\*</sup>

8

9

10

11

12

13

14 <sup>1</sup>Department of Biological Sciences

15 Korea Advanced Institute of Science and Technology (KAIST)

16 Daejeon 34141

17 Republic of Korea

18

19 <sup>2</sup>These authors contributed equally

20

21 Correspondence: [seongbaesuh@kaist.ac.kr](mailto:seongbaesuh@kaist.ac.kr)

22 **Abstract**

23 Animals are able to detect the nutritional content of sugar independently of taste.  
24 When given a choice between nutritive sugar and nonnutritive sugar, animals develop  
25 a preference for nutritive sugar over nonnutritive sugar during a period of food  
26 deprivation<sup>1-5</sup>. To quantify behavioral features during an episode of licking nutritive  
27 versus nonnutritive sugar, we implemented a multi-vision, deep learning-based 3D  
28 pose estimation system, termed the AI Vision Analysis for Three-dimensional Action  
29 in Real-Time (AVATAR)<sup>6</sup>. Using this method, we found that mice exhibit significantly  
30 different approach behavioral responses toward nutritive sugar versus nonnutritive  
31 sugar even before licking a sugar solution. Notably, the behavioral sequences during  
32 approach toward nutritive versus nonnutritive sugar became significantly different over  
33 time. These results suggest that the nutritional value of sugar not only promotes its  
34 consumption, but also elicits distinct repertoires of feeding behavior in deprived mice.

35

36

## 37 **Introduction**

38 Animals innately prefer nutritive sugar over nonnutritive sugar or can learn to develop  
39 this preference over time<sup>1,3,7</sup>. Given that sweet-blind mice prefer nutritive over  
40 nonnutritive sugars, this preference is independent of taste input<sup>8-10</sup>. It is unclear,  
41 however, whether an increase in the consumption of a nutritive sugar over a  
42 nonnutritive one is a behavioral response that can be quantified and analyzed in detail.  
43 Mice may superficially appear to approach nutritive sugars differently than they  
44 approach nonnutritive sugars, but the details of their behavioral repertoires spurred by  
45 metabolic needs may be different. Indeed, superficially similar behaviors could be  
46 distinguished by analyzing the behavior itself using precise behavioral quantification  
47 methods<sup>11,12</sup>.

48 Innately motivated behaviors, including the consumption of nutritive sugars  
49 during a period of food deprivation, are classically composed of three main phases:  
50 appetitive, consummatory, and satiety phases<sup>13,14</sup>. It is well known that animals display  
51 significantly different sequences of behavior during each phase, each often requiring  
52 a massive amount of behavioral annotation. Recent advances in computer vision  
53 machine learning have led to an efficient and precise way to extract the postures of a  
54 behaving animal from each image at a high spatial and temporal resolution<sup>15-17</sup>. In  
55 studies of the motor system, for example, a deep learning tool with a higher resolution  
56 has been used to analyze the role of the motor cortex<sup>18,19</sup>. Recently, the pose  
57 estimation model was used to analyze complex social behaviors of mice that include  
58 mating and fighting<sup>11,17</sup>. The mounting behavior of a male mouse, for example, varies  
59 with the sex of the encountered mouse. A male mouse may mount both male and  
60 female mice, but the sequence of his mounting behavior is distinct enough for a  
61 machine-learning-based classifier to distinguish between mounting followed by attack  
62 versus mating<sup>11</sup>. It is unknown, however, whether mice exhibit distinct appetitive-  
63 related behaviors in response to the nutritional value of food.

64 In this study, we applied a deep learning-based 3D pose estimation system,  
65 the AI Vision Analysis for Three-dimensional Action in Real-Time (AVATAR) system  
66 to use the coordination of 9 body points to quantify and analyze animal behaviors<sup>6</sup>  
67 while they develop a preference for nutritive sucrose over nonnutritive sucralose. We  
68 found that fasted mice not only consumed considerable amounts of sucrose solution,

69 but exhibited significantly different approach behavioral repertoires toward sucrose  
70 solution within 30 minutes of the first exposure. Using a deep learning-based system  
71 combined with a conventional measurement of food consumption, we were able to  
72 shed light on how nutritive food is selected over equally palatable, yet nonnutritive food  
73 by fasted mice and create a precise and large-scale behavioral dataset.

74

## 75 **Results**

### 76 **Mice develop a preference for nutritive sugar over nonnutritive sugar when** 77 **fasted.**

78 Previous studies using *Drosophila* revealed that flies develop a preference for nutritive  
79 sugar depending on their energy status. Fasted flies select nutritive sugars over non-  
80 nutritive sugars within 5 minutes, whereas sated flies do not necessarily demonstrate  
81 a preference for nutritive sugar<sup>4,5</sup>. It is unknown, however, whether mice that had not  
82 been previously exposed to nutritive or nonnutritive sugars exhibit the starvation-  
83 induced preference for nutritive sugars. To investigate this matter, we first established  
84 a behavioral assay to measure the starvation-induced preference for nutritive sugars.  
85 To determine whether mice can detect and prioritize the nutritional content of sugar  
86 over its sweet content without conditioning, we designed a two-choice assay in which  
87 naïve mice (i.e., mice that had not been exposed to a plain sucrose or sucralose  
88 solution) were given a choice between a bottle containing a 100-mM sucrose solution  
89 and a bottle containing an equally sweet 0.5-mM nonnutritive sucralose solution under  
90 fasted conditions.

91 Overnight fasted mice were presented with the two bottles and their  
92 consumption was measured using a custom-made lickometer. Within 30 minutes,  
93 fasted mice consumed more of the sucrose solution than the sucralose solution  
94 (**Figure 1B**). We also observed that fasted mice rapidly developed a preference for  
95 sucrose within 10 minutes (**Figure 1B, black arrow**). The inter-bout interval was  
96 shorter while licking the sucrose solution compared to the sucralose solution (**Figure**  
97 **1E**). These results suggest that fasted and unconditioned mice rapidly develop a  
98 preference for sucrose over sucralose.

99

100

101 **Fasted mice exhibit significantly different behaviors toward nutritive sucrose**  
102 **versus nonnutritive sucralose.**

103 We next used a machine-learning-based method to quantify and classify changes in  
104 the sequence of behaviors as they developed a preference for sucrose. Our analysis  
105 of licking behavioral patterns revealed that the number of licking bouts for sucrose  
106 increased rapidly while the duration of licking bouts decreased (**Figures 1F and 1G**),  
107 suggesting an increase in preference for sucrose during the appetitive phase<sup>13,20</sup>. We  
108 hypothesized that the behavioral changes during the appetitive phase may coincide  
109 with the development of sucrose preference.

110 We therefore sought to track and record distinctive features of the appetitive  
111 behavior toward sucrose versus sucralose by using a deep learning-based 3D pose-  
112 estimation algorithm (AVATAR)<sup>6</sup>. To do so, we constructed a system to measure and  
113 quantify behavior sequences during the two-choice assay. We first devised the two-  
114 bottle choice task chamber and lickometer, in which two licking spouts on the bottle  
115 are exposed on a glass wall in the chamber. The behaviors of mice were recorded  
116 from five different directions in the AVATAR multi-vision studio (**Figure 1H**). Licking  
117 events and 5 multi-vision collage images were temporally synchronized. We then  
118 collected the coordination of body pose (27 arrays; 9 body-points x 3 axes) at each  
119 video frame using the AVATAR posenet that was trained for approximately 20 frames  
120 with the two-bottles (**Figure 1H**). We next generated a 3D action skeleton, which is  
121 illustrated in the AVATAR web stimulator (**Figure 1I**), to visualize and analyze the  
122 dynamic action sequences and cumulative licking events.

123 To analyze the behavioral sequences selectively during the phase of approach  
124 behavior, we collected the coordination of body pose for approximately 3.3 seconds  
125 (100 frames with 30 FPS; 2700 vectors x the number of licks) before each licking bout.  
126 Several binary classification algorithms (Naive Bayes, SVM with Gaussian Kernel, and  
127 logistic regression classifiers)<sup>21</sup> were used to evaluate the behavior sequence data  
128 and allow us to discriminate between the approach behaviors for sucrose versus  
129 sucralose (**Figure 2B**). We found that the performance of the Naive Bayes and  
130 Gaussian SVM classifiers was significantly higher than by chance (Naive Bayes:  
131 75.7%, SVM Gaussian: 81.2%) (**Figures 2B-2D**). Remarkably, both classifiers  
132 showed higher classification accuracy when the behavior sequences extracted from  
133 the late period of the same experiment were used (**Figure 2E**). This suggested that

134 the approach behavior toward sucrose is qualitatively distinct from the behavior toward  
135 sucralose over time.

136 To determine how the approach behavior toward sucrose versus sucralose  
137 changed over a period of 30 minutes, we embedded the detected body postures during  
138 approach to each sugar into a 3D space by using a t-distributed stochastic neighbor  
139 (t-SNE) for visualization. In the 3 dimensional t-SNE space, we found that the body  
140 postures during the approach behavior were distributed separately (**Figure 2F**).  
141 Furthermore, we observed that the difference in behavioral response between the two  
142 approach behaviors substantially increased over time (**Figure 2F**). This is consistent  
143 with the improvement of binary classifier's performance trained with the approach  
144 behavior during the late period of the two-choice assay (**Figure 2E**). Unsupervised k-  
145 means clustering on the t-SNE embedding further revealed that the approach behavior  
146 was clustered into 4 types (**Figure 2G**). Clusters 3 and 4 mainly represented the  
147 approach behavior specific for sucrose (**Figure 2I**). To identify any similarities among  
148 the 4 clusters, we applied the hierarchical clustering method, which consisted of an  
149 unweighted pair group method with arithmetic mean (UPGMA), and plotted a  
150 dendrogram (**Figure 2H**). Notably, Clusters 3 and 4 had the greatest similarities in the  
151 approach behavior during the late period of the two-choice assay (**Figures 2F-2H**).  
152 These results indicated that an approach behavior toward nutritive sugar was  
153 significantly different from another approach behavior toward nonnutritive sugar.

154 We further explored the features of the sucrose-specific approach behavior.  
155 To display representative behavioral sequences in each cluster, we reconstructed the  
156 representative approach behavior of each cluster using a centroid of the k-means  
157 clustering into a 3D posture (**Figure 2J**). Interestingly, the representative behavior of  
158 Cluster 3, which largely comprised the approach behavior toward sucrose, consisted  
159 of initially selecting the opposite bottle and then switching to the sucrose bottle (**Figure**  
160 **2J left bottom**). The representative behavior of Cluster 4, another sucrose-approach  
161 cluster, consisted of the mice directly raising their head to the sucrose bottle from the  
162 bottom of the chamber, rather than approaching from the top (**Figure 2J right bottom**).  
163 Inferred from the qualitative differences in the approach behavior, segregated neural  
164 circuits may be activated in order to trigger distinct feeding behaviors toward sucrose  
165 versus sucralose, as suggested in the previous studies<sup>2,3</sup>.

166

## 167 **Discussion**

168 In our attempt to identify differences in the approach behavior of fasted mice toward  
169 nutritive sugar versus nonnutritive sugar, we found that fasted mice can rapidly  
170 recognize and select nutritive sucrose over nonnutritive sucralose without conditioning.  
171 Using the deep-learning 3D pose estimation model and the machine learning based-  
172 classifiers, we identified a significant difference during the approach behavior toward  
173 sucrose versus sucralose. Notably, the difference developed within 30 minutes of  
174 exposure. Furthermore, among two distinct types of the approach behavior revealed  
175 by unsupervised clustering, the sucrose-specific approach behavior became prevalent  
176 over time.

177 Researchers have traditionally measured the amounts of consumed food or  
178 water to determine feeding or drinking behaviors<sup>22,23</sup>. In this study, we combined these  
179 conventional measurements with the quantification of mice behaviors using machine-  
180 learning approaches, including 3D pose estimation, supervised learning algorithms for  
181 classifications, and dimensionality reduction. These methods allowed us to evaluate  
182 the behavior of mice during the appetitive phase with precision and revealed that  
183 fasted mice exhibit qualitatively different approach behavior according to their  
184 metabolic needs. It would be interesting further to elucidate how two distinct approach  
185 responses for sucrose and sucralose are controlled by different neural circuits.

186 Recent advances in the deep learning-based pose estimation have introduced  
187 a new way of analyzing detailed behavioral responses<sup>24-30</sup>. Instead of providing a  
188 subjective analysis, it can automatically quantify animal behaviors at a high resolution  
189 to produce a large and highly accurate dataset<sup>11,30</sup>. In this study, we used the recently  
190 developed AVATAR, which facilitated the creation of an accurate 3D pose estimation  
191 of mice during the two-choice assay<sup>6</sup>. This allowed us to overcome the limitation of the  
192 2D pose estimation model with a single camera view. The multiple directions of  
193 recording used in our method permitted the detection of each body posture with  
194 precision despite potential occlusion by the spout of bottles.

195 For future studies, we plan to use this method to quantify and analyze other  
196 goal-directed behaviors, including eating, lever pressing, or nose poking, to further  
197 understand the dynamics of these behaviors and gain insight into neural substrates  
198 that are tuned to these behaviors. Furthermore, the two-bottle choice paradigm  
199 adopted in the AVATAR studio would be applicable for providing quantifiable

200 behavioral scoring of affective behaviors caused by neurological disorders –  
201 depression, anhedonia and post-traumatic stress disorder (PTSD) in rodent models.

202

203

204

205

206

207

208

209

210

211

212

213

214

215

216

217

218

219

220

221



## 222 **Methods**

223 **Animals.** For wild-type experiments, male C57BL/6J (Jackson Laboratories stock  
224 #000664) adult mice (8-16 weeks of age) were used. All mice were single housed  
225 under a 12 h light/dark cycle and *ad libitum* access to food and water. All animal  
226 experiments were performed according to protocols approved by KAIST IACUC  
227 following the National Institutes of Health guidelines for the Care and Use of  
228 Laboratory Animals.

229

## 230 **Short-term two-bottle preference test**

231 For three days, single-housed naive mice were acclimated to two bottles with drinking  
232 spouts in their home cage. Mice were habituated in a behavior apparatus (20 x 20 x  
233 20 cm) with two spouts connected to a custom-designed lickometer (Arduino UNO)  
234 before testing. Mice were trained to lick from bottles with spouts by restricting their  
235 access to water for 20 hours and then introducing them to the cage for two days of  
236 habituation. With no side bias for each sipper - less than a 25% preference index - and  
237 at least 200 licks within thirty minutes, these acclimation sessions were considered  
238 successful. They are then placed in a home cage for one day and fed *ad libitum* with  
239 water and food. Mice were housed in a new bedding cage and deprived of food for 18-  
240 20 hours with free access to water for fasting conditions. Mice were acclimated in the  
241 behavior chamber box for 20 minutes before being placed into an apparatus with two  
242 bottles containing either 100 mM sucrose or 0.5 mM sucralose. All behavioral  
243 experiments were videotaped and recorded 1-2 hours after the dark cycle started.  
244 Preference index (%); percentage of the total licks for sucrose or sucralose =  
245  $(\text{Lick}_{\text{Sucrose}} - \text{Lick}_{\text{Sucralose}}) / (\text{Lick}_{\text{Sucrose}} + \text{Lick}_{\text{Sucralose}}) \times 100$ . The raw data from the  
246 lickometer was used to investigate licking dynamics using custom-designed MATLAB  
247 code.

248

249

250

## 251 **AVATAR 3D system**

252 A specially designed multi-vision system was used to quantify the mice's 3D behavior.  
253 The vision system, which consists of four cameras on the sides and one on the bottom,  
254 can closely observe the mouse's external shape. Each camera's image data is sent to  
255 a PC for analysis and concatenation into a single image frame. AVATAR posenet  
256 analyzes these frames (3600x2000 pixel), detecting 9 body-points (nose, head, body  
257 center, anus, forelimbs, hind limbs, tail tip) of the target mouse in each area. Through  
258 the 3D reconstruction algorithm, these 2D coordinates are calculated as XYZ  
259 coordinates where the mouse was actually located. The final output data is a csv file  
260 containing a recorded frame (54000 rows; 30min) and body coordination information  
261 (27 arrays; 9 body points x 3 axes). To synchronize the behavior recording with the  
262 custom-made lickometer, a custom-made lickometer sent the specific signal on the  
263 camera's image whenever the mice licked the bottle, and the AVATAR posenet further  
264 detected the specific signal from the camera's image.

265

## 266 **AVATAR Web Simulator**

267 The AVATAR web simulator can visualize the pose data file (csv) quantified in the  
268 AVATAR 3D system. The 9 body-points coordination are combined into 8 vector sets  
269 that represent the actual mouse skeleton (nose-head, head-body center, body center-  
270 anus, anus-tail tip, body center-left forelimb, body center-right forelimb, anus-left  
271 hindlimb, anus-right hindlimb). The WebGL-based 3D visualization library is used to  
272 simulate these vector data sets. This web simulator allows researchers to observe the  
273 skeletal changes and behavior of mice. It is possible to control the time frame and  
274 pose sequence time-bin, view-point, and pose records. It also visualizes the actual  
275 bottle position and dynamically plots the lick data of each bottle consumed by the  
276 mouse using lickometer sensor data.

277

278

279

## 280 **Analysis**

281 For the pose sequence classification, the "Classification Learner App" from the  
282 Statistics and Machine Learning Toolbox for MATLAB R2022a was used. We selected  
283 several classifiers, such as Naive Bayes, SVM with Gaussian Kernel, and logistic  
284 regression. The software allowed users to explore data, choose features, and  
285 configure validation strategies using the Classification Learner App. Confusion Matrix  
286 plots, Parallel Coordinates plots, ROC Curve plots, Scatter plots, and the classification  
287 accuracy of the model developed are all generated using this interactive classifier.  
288 Also, t-SNE clustering, k-means classification, and hierarchical clustering method  
289 (UPGMA) analysis results were solved using MATLAB.

290

## 291 **Quantification and Statistical Analysis**

292 All statistical analysis is done in MATLAB or Prism software. An unpaired or pair-wise  
293 comparison was made using a two-tailed student's t-test. Data are presented as mean  
294  $\pm$  s.e.m. All statistical analyses were performed with GraphPad Prism 9.0.2. To  
295 compare two groups that present the normal distribution, unpaired two-tailed t-tests  
296 were conducted.

297

## 298 **Data and Software Availability**

299 The datasets that support the findings of this study are available from the  
300 corresponding author upon reasonable request.

301

302

303

304

305

306 **Figure legends**

307 **Figure 1. Mice rapidly develop a preference for nutritive sugar when fasted.**

308 **(A)** Left: Schematics of two-bottle choice preference for nutritive sucrose (100mM  
309 sucrose) and non-nutritive sucralose (0.5mM sucralose) in mice fasted overnight.

310 **(B)** Plots for cumulative licks over 30 mins of two-choice preference assay. Orange  
311 line: sucrose, Green line: sucralose. Lines and shaded areas indicate mean +/- SEM.

312 **(C)** Raster plots for lick event train for each analyzed mouse. Orange ticks: licks for  
313 sucrose, Green ticks: licks for sucralose.

314 **(D-G)** Quantifications of total licks (D), interbout-interval (E), number of lick bouts, and  
315 duration of lick bout in 10-minute time bin during 30 mins of the assay (F and G). Lick  
316 bout was defined as a series of licks with an inter-lick interval of less than 1 second.

317 **(H)** Schematics of a two-bottle choice paradigm in the AVATAR 3D studio. Two bottles  
318 are connected to a custom-made capacitance-based lickometer. Licking events and 5  
319 multi-vision collage images were synchronized and 27 arrays of the 3D action skeleton  
320 were collected.

321 **(I)** Screenshot of the web simulator that can visualize the dynamic 3D pose sequence  
322 and lickometer sensor data while using AVATAR. A link to the AVATAR web simulator  
323 during the two-choice preference task: [Two choice.js app](#).

324

325 **Figure 2. Analysis of two-bottle choice behaviors using the AVATAR system**

326 **(A)** For the pose sequence data aligned to the licking events, we gained 27 arrays  
327 (x,y,z points from 9 body points) at each frame for 100 frames before the onset of  
328 licking bouts. The action skeleton array (pose sequence data) during the target time  
329 window, as one-hot vector of 2700, was used for each mouse as the final matrix data  
330 to be further analyzed.

331 **(B)** Bar graphs indicating the classification accuracy by binary classifiers with shuffled  
332 (grey) and labeled data (red); Logistic regression (Label:53.1%, Shuffle:51.1%), Naïve  
333 Bayes (Label:75.7%, Shuffle:47.8%), SVM with Gaussian kernel filter (Label:81.2%,  
334 Shuffle:49.8%). The orange dash line denotes 50% accuracy as a reference.

335 **(C)** The receiver operator characteristic (ROC) curve from the SVM classifier in **B**. The  
336 Area Under the Curve (AUC) for the ROC curve is 0.84.

337 **(D)** The confusion matrix of the SVM classification is used to evaluate the performance  
338 of the classification model for the predicted and actual classes.

339 **(E)** Classification accuracy in 10-minute intervals (3 phase: 0-10 min, 10-20 min, 20-  
340 30 min). Yellow line: SVM Gaussian kernel, Redline: Naive Bayes, and Blue line:  
341 Logistic regression; 0-10(min) phase: Yellow=69.4, Red=64.5, Blue=57.0; 10-20(min)  
342 phase: Yellow=75.6, Red=70.8, Blue=57.3; 20-30(min) phase: Yellow=81.2,  
343 Red=78.3, Blue=53.4.

344 **(F)** Three-dimensional projection representing clusters by visualizing t-SNE for pre-  
345 lick pose sequence data, labeled with each licking bottle. Orange dots: licking from  
346 sucrose. Green dots: licking from sucralose. The scale of each color saturation implies  
347 a time flag during the task (Saturation: 10~100% = Frame: 1~60000). Total cluster  
348 points consisted of 307 licking trials (sucrose: 224 points, sucralose: 83 points).

349 **(G)** Three-dimensional projection representing each cluster classified by the  
350 unsupervised algorithm (K-means classification). Cluster 1: Purple, Cluster 2: Blue,  
351 Cluster 3: Green, Cluster 4: Red.

352 **(H)** Dendrogram chart to illustrate the similarity and hierarchical relationship of all 307  
353 pose sequences. They are divided into 4 sub-clusters with 10.5 similarities and  
354 compared with the t-SNE cluster in **G** through the color box tag. Hierarchically, clusters  
355 1 and 2 are close, and clusters 3 and 4 are close.

356 **(I)** Bar graphs demonstrating the licking trials of each t-SNE cluster. Cluster1 has  
357 61(63%) sucrose trials and 35(47%) sucralose trials; Cluster2: 35(50%) sucrose,  
358 35(50%) sucralose; Cluster3: 53(88%) sucrose, 7(12%) sucralose; Cluster 4: 75(93%)  
359 sucrose, 6(7%) sucralose.

360 (J) Representative 3D action sequence patterns from each cluster identified in G. Top  
361 left (Cluster #1): heads up toward the sipper, Top right (Cluster #2): heads down,  
362 Bottom left (Cluster #3): stretching its neck toward the sipper, Bottom right (Cluster  
363 #4): running toward a sipper. A [link to the AVATAR simulator for each cluster](#).

364

365 **Acknowledgements:** This study was supported by grants from KAIST Advanced  
366 Institute-X (KAIX) Fellowship and ASAN Biomedical Science Fellowship to J.K, grants  
367 from the Samsung Science and Technology Foundation (SSTF-BA-1802-11), National  
368 Research Foundation of Korea (NRF-2020R1A2C2009865 and NRF-  
369 2022M3A9F3082982) to G.S.B.S. and (NRF-2019M3E5D2A01066259) to Daesoo  
370 Kim who contributed to the development of the AVATAR system, the AI-based analysis  
371 and interpretation of animal behavior, and a grant from the NRF funded by Ministry  
372 and Science and ICT (2021 NRF-M3F3A2A01037365) to G.S.B.S as a co-PI.

### 373 **Competing Interest Statement**

374 The authors declare the following competing interests: D-G Kim is a co-founder of the  
375 company ACTNOVA. The other authors declare no competing interests.

376

377 **Author Contributions:** D-G. K. developed the AVATAR hardware and software  
378 algorithm platforms. J. K. performed behavioral experiments with help from W.G. and  
379 D-G. K. J.K. and W.G. contributed to the development of the hardware and analysis  
380 platform for customized lickometer. G.S.B.S conceived and supervised the project.  
381 J.K., and G.S.B.S wrote the manuscript with inputs from other authors.

382

383

384 **REFERENCES**

- 385 1 Buchanan, K. L. *et al.* The preference for sugar over sweetener depends on a  
386 gut sensor cell. *Nature neuroscience*, 1-10 (2022).
- 387 2 Tan, H.-E. *et al.* The gut–brain axis mediates sugar preference. *Nature* **580**,  
388 511-516 (2020).
- 389 3 Tellez, L. A. *et al.* Separate circuitries encode the hedonic and nutritional values  
390 of sugar. *Nature neuroscience* **19**, 465-470 (2016).
- 391 4 Dus, M. *et al.* Nutrient Sensor in the Brain Directs the Action of the Brain-Gut  
392 Axis in *Drosophila*. *Neuron* **87**, 139-151, doi:10.1016/j.neuron.2015.05.032  
393 (2015).
- 394 5 Dus, M., Min, S., Keene, A. C., Lee, G. Y. & Suh, G. S. Taste-independent  
395 detection of the caloric content of sugar in *Drosophila*. *Proc Natl Acad Sci U S*  
396 *A* **108**, 11644-11649, doi:10.1073/pnas.1017096108 (2011).
- 397 6 Kim, D.-G., Shin, A., Jeong, Y.-C., Park, S. & Kim, D. AVATAR: AI Vision  
398 Analysis for Three-dimensional Action in Real-time. *bioRxiv*, 2021.2012.  
399 2031.474634 (2022).
- 400 7 Dus, M., Ai, M. & Suh, G. S. Taste-independent nutrient selection is mediated  
401 by a brain-specific Na<sup>+</sup> /solute co-transporter in *Drosophila*. *Nat Neurosci* **16**,  
402 526-528, doi:10.1038/nn.3372 (2013).
- 403 8 Damak, S. *et al.* Detection of sweet and umami taste in the absence of taste  
404 receptor T1r3. *Science* **301**, 850-853 (2003).
- 405 9 De Araujo, I. E. *et al.* Food reward in the absence of taste receptor signaling.  
406 *Neuron* **57**, 930-941 (2008).
- 407 10 Ren, X. *et al.* Nutrient selection in the absence of taste receptor signaling.  
408 *Journal of Neuroscience* **30**, 8012-8023 (2010).
- 409 11 Karigo, T. *et al.* Distinct hypothalamic control of same-and opposite-sex  
410 mounting behaviour in mice. *Nature* **589**, 258-263 (2021).
- 411 12 Calhoun, A. J., Pillow, J. W. & Murthy, M. Unsupervised identification of the  
412 internal states that shape natural behavior. *Nat Neurosci* **22**, 2040-2049,  
413 doi:10.1038/s41593-019-0533-x (2019).
- 414 13 Craig, W. Appetites and aversions as constituents of instincts. *Proceedings of*  
415 *the National Academy of Sciences of the United States of America* **3**, 685  
416 (1917).
- 417 14 Sherrington, C. The integrative action of the nervous system New York.  
418 *Scribner & Son* (1906).
- 419 15 Hausmann, S. B., Vargas, A. M., Mathis, A. & Mathis, M. W. Measuring and  
420 modeling the motor system with machine learning. *Current opinion in*  
421 *neurobiology* **70**, 11-23 (2021).
- 422 16 Pereira, T. D., Shaevitz, J. W. & Murthy, M. Quantifying behavior to understand  
423 the brain. *Nature neuroscience* **23**, 1537-1549 (2020).
- 424 17 Pereira, T. D. *et al.* SLEAP: A deep learning system for multi-animal pose  
425 tracking. *Nature methods* **19**, 486-495 (2022).
- 426 18 Ebina, T. *et al.* Arm movements induced by noninvasive optogenetic stimulation  
427 of the motor cortex in the common marmoset. *Proceedings of the National*  
428 *Academy of Sciences* **116**, 22844-22850 (2019).
- 429 19 Sauerbrei, B. A. *et al.* Cortical pattern generation during dexterous movement  
430 is input-driven. *Nature* **577**, 386-391 (2020).
- 431 20 Brierley, D. I., Samuels, J., Duncan, M., Whalley, B. J. & Williams, C. M.

- 432 Cannabigerol is a novel, well-tolerated appetite stimulant in pre-satiated rats.  
433 *Psychopharmacology* **233**, 3603-3613 (2016).
- 434 21 Patsadu, O., Nukoolkit, C. & Watanapa, B. in *2012 ninth international*  
435 *conference on computer science and software engineering (JCSSE)*. 28-32  
436 (IEEE).
- 437 22 Bachmanov, A. A., Reed, D. R., Beauchamp, G. K. & Tordoff, M. G. Food intake,  
438 water intake, and drinking spout side preference of 28 mouse strains. *Behavior*  
439 *genetics* **32**, 435-443 (2002).
- 440 23 Ellacott, K. L., Morton, G. J., Woods, S. C., Tso, P. & Schwartz, M. W.  
441 Assessment of feeding behavior in laboratory mice. *Cell metabolism* **12**, 10-17  
442 (2010).
- 443 24 Mathis, A. *et al.* DeepLabCut: markerless pose estimation of user-defined body  
444 parts with deep learning. *Nature neuroscience* **21**, 1281-1289 (2018).
- 445 25 Arac, A., Zhao, P., Dobkin, B. H., Carmichael, S. T. & Golshani, P. DeepBehavior:  
446 A deep learning toolbox for automated analysis of animal and human behavior  
447 imaging data. *Frontiers in systems neuroscience* **13**, 20 (2019).
- 448 26 Graving, J. M. *et al.* DeepPoseKit, a software toolkit for fast and robust animal  
449 pose estimation using deep learning. *Elife* **8**, e47994 (2019).
- 450 27 Günel, S. *et al.* DeepFly3D, a deep learning-based approach for 3D limb and  
451 appendage tracking in tethered, adult *Drosophila*. *Elife* **8**, e48571 (2019).
- 452 28 Nath, T. *et al.* Using DeepLabCut for 3D markerless pose estimation across  
453 species and behaviors. *Nature protocols* **14**, 2152-2176 (2019).
- 454 29 Pereira, T. D. *et al.* Fast animal pose estimation using deep neural networks.  
455 *Nature methods* **16**, 117-125 (2019).
- 456 30 Schneider, A. *et al.* 3D pose estimation enables virtual head fixation in freely  
457 moving rats. *Neuron* (2022).

458



## Figure 1

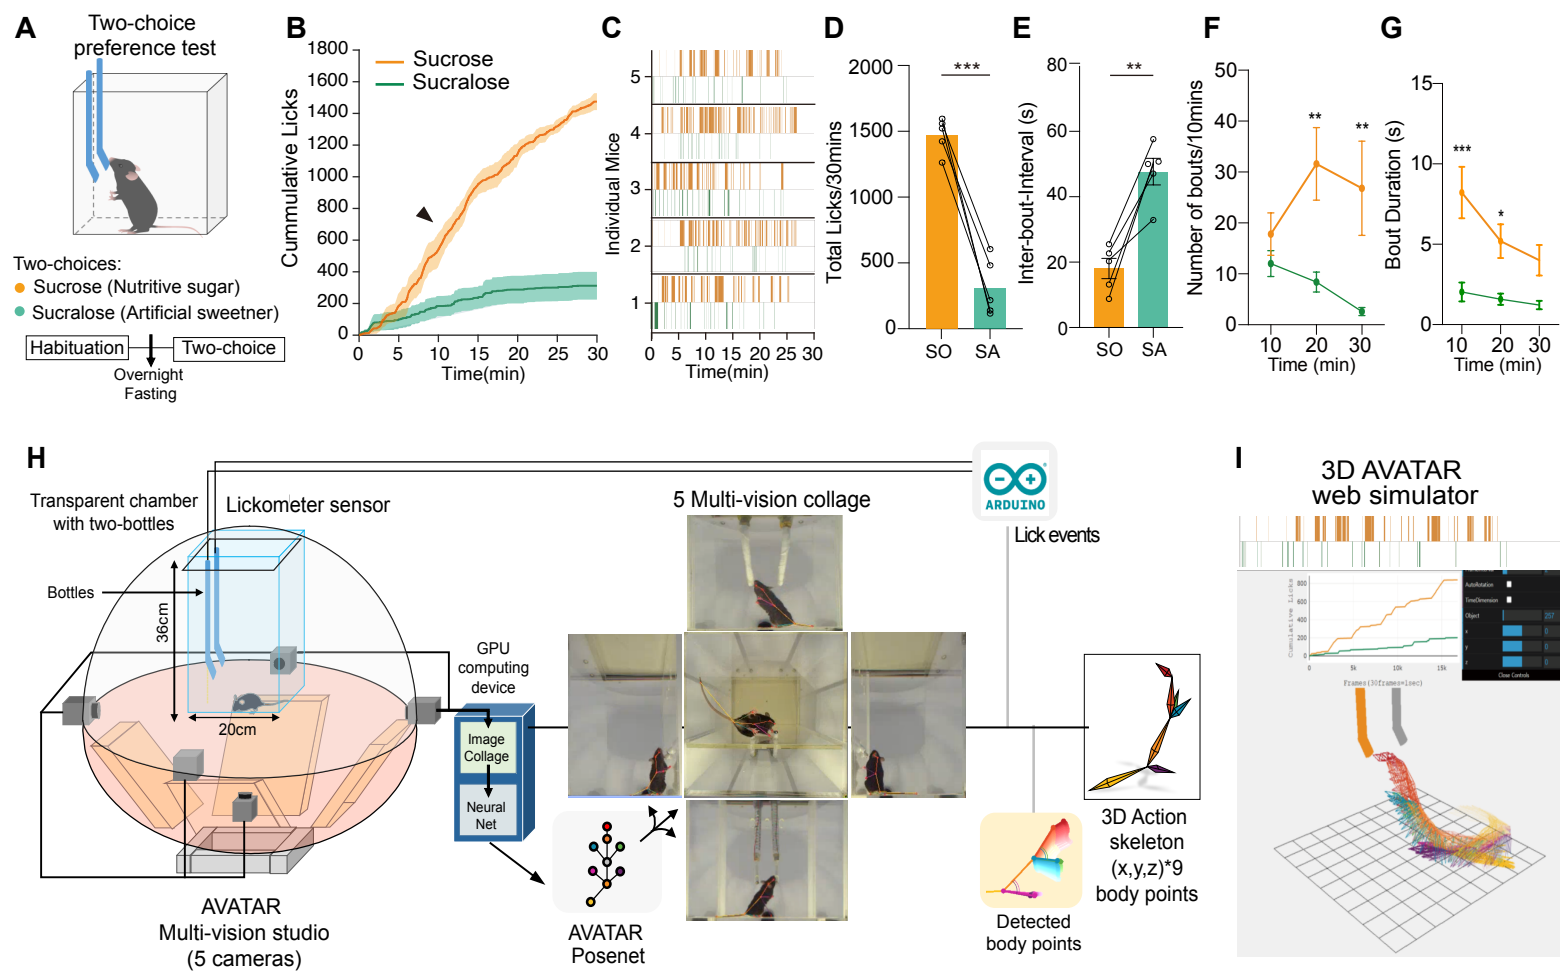

## Figure 2

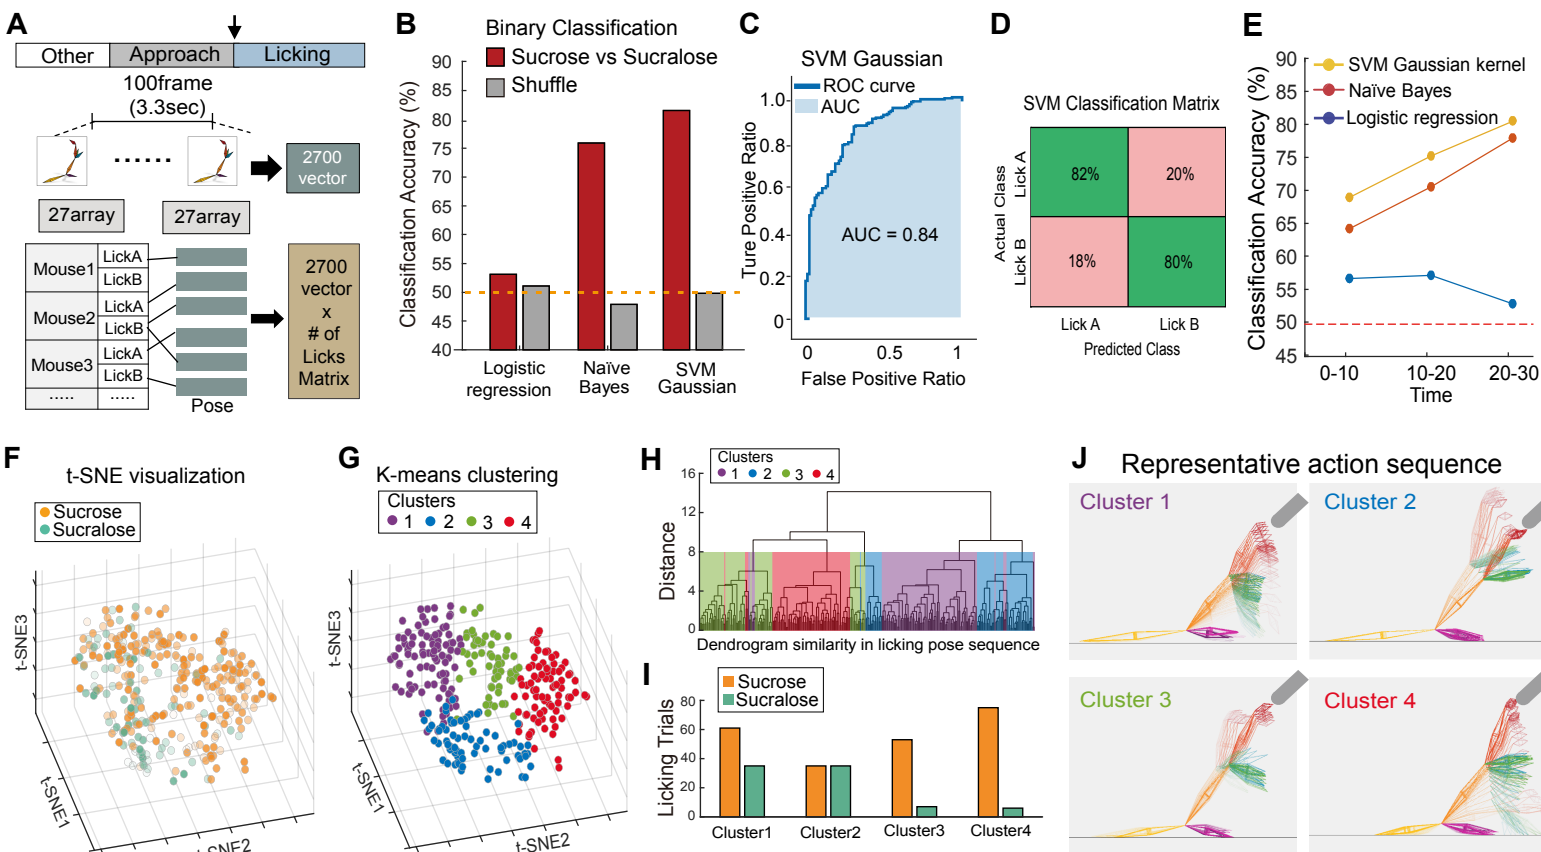

Source: https://www.biorxiv.org/content/10.1101/2022.09.19.508605v1.full.pdf
